# Supplementary material for: β-(C3H7N6)2Cl2·H2O and (C3H7N6)F·H2O: two UV birefringent crystals induced by uniformly aligned structural groups
Source: Royal Society of Chemistry journal article supplement (doi:10.1039/d2qi02535c), 2023-01-01
Supplement: d2qi02535c1.pdf [file d2qi02535c1.pdf]

# Electronic Supplementary Information

## $\beta$ -(C<sub>3</sub>H<sub>7</sub>N<sub>6</sub>)<sub>2</sub>Cl<sub>2</sub>·H<sub>2</sub>O and (C<sub>3</sub>H<sub>7</sub>N<sub>6</sub>)F·H<sub>2</sub>O: two UV birefringent crystals induced by the uniformly aligned structural groups

Yaoguo Shen,<sup>\*a</sup> Liang Ma,<sup>b</sup> Guofa Dong,<sup>\*b</sup> Hualiang Yu<sup>a</sup> and Junhua Luo<sup>c</sup>

### Contents

|                                                                                                                                                                                      |    |
|--------------------------------------------------------------------------------------------------------------------------------------------------------------------------------------|----|
| Fig. S1 The as-grown crystals for (a) MELCl and (b) MELF. ....                                                                                                                       | S2 |
| Fig. S2 Infrared spectra for (a) MELCl and (b) MELF. ....                                                                                                                            | S2 |
| Fig. S3 Electronic band structures for (a) MELCl and (b) MELF.....                                                                                                                   | S3 |
| Fig. S4 The crystal thickness for the birefringence measurements. ....                                                                                                               | S3 |
| Table S1. Atomic Coordinates and Isotropic Displacement Parameters for $\beta$ -(C <sub>3</sub> H <sub>7</sub> N <sub>6</sub> ) <sub>2</sub> Cl <sub>2</sub> ·H <sub>2</sub> O. .... | S4 |
| Table S2. Anisotropic Displacement Parameters for $\beta$ -(C <sub>3</sub> H <sub>7</sub> N <sub>6</sub> ) <sub>2</sub> Cl <sub>2</sub> ·H <sub>2</sub> O.....                       | S5 |
| Table S3. Bond Lengths for $\beta$ -(C <sub>3</sub> H <sub>7</sub> N <sub>6</sub> ) <sub>2</sub> Cl <sub>2</sub> ·H <sub>2</sub> O.....                                              | S5 |
| Table S4. Bond Angles for $\beta$ -(C <sub>3</sub> H <sub>7</sub> N <sub>6</sub> ) <sub>2</sub> Cl <sub>2</sub> ·H <sub>2</sub> O. ....                                              | S6 |
| Table S5. Atomic Coordinates and Isotropic Displacement Parameters for (C <sub>3</sub> H <sub>7</sub> N <sub>6</sub> )F·H <sub>2</sub> O.....                                        | S7 |
| Table S6. Anisotropic Displacement Parameters for (C <sub>3</sub> H <sub>7</sub> N <sub>6</sub> )F·H <sub>2</sub> O. ....                                                            | S7 |
| Table S7. Bond Lengths for (C <sub>3</sub> H <sub>7</sub> N <sub>6</sub> )F·H <sub>2</sub> O. ....                                                                                   | S7 |
| Table S8. Bond Angles for (C <sub>3</sub> H <sub>7</sub> N <sub>6</sub> )F·H <sub>2</sub> O.....                                                                                     | S8 |
| Table S9. Hydrogen Bonds for (C <sub>3</sub> H <sub>7</sub> N <sub>6</sub> )F·H <sub>2</sub> O.....                                                                                  | S8 |

---

<sup>a</sup> College of Physics and Electronic Information Engineering, Minjiang University, Fuzhou, Fujian 350108, China. Email: shenyg@mju.edu.cn

<sup>b</sup> Department of Materials, College of Materials and Chemical Engineering, Minjiang University, Fuzhou, Fujian 350108, China. Email: gfdong@mju.edu.cn

<sup>c</sup> State Key Laboratory of Structural Chemistry, Fujian Institute of Research on the Structure of Matter, Chinese Academy of Sciences, Fuzhou, Fujian 350002, China.

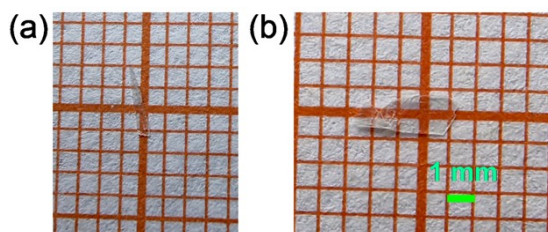

Fig. S1 The as-grown crystals for (a) MELCI and (b) MELF.

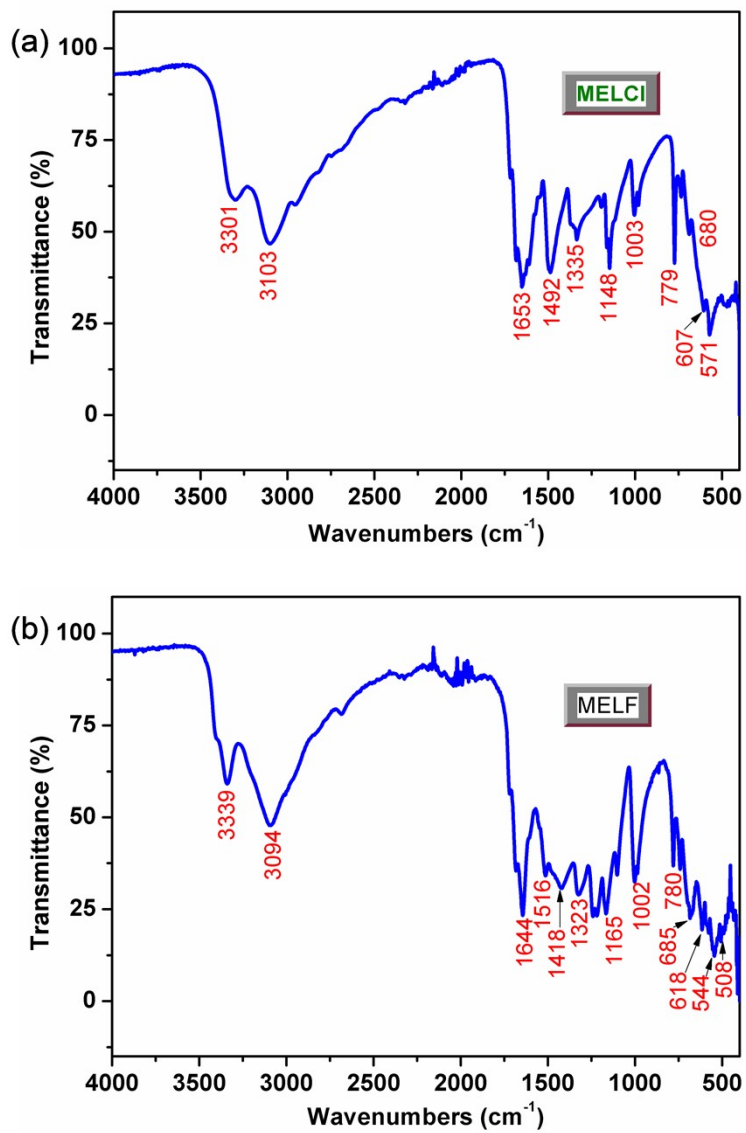

Fig. S2 Infrared spectra for (a) MELCI and (b) MELF.

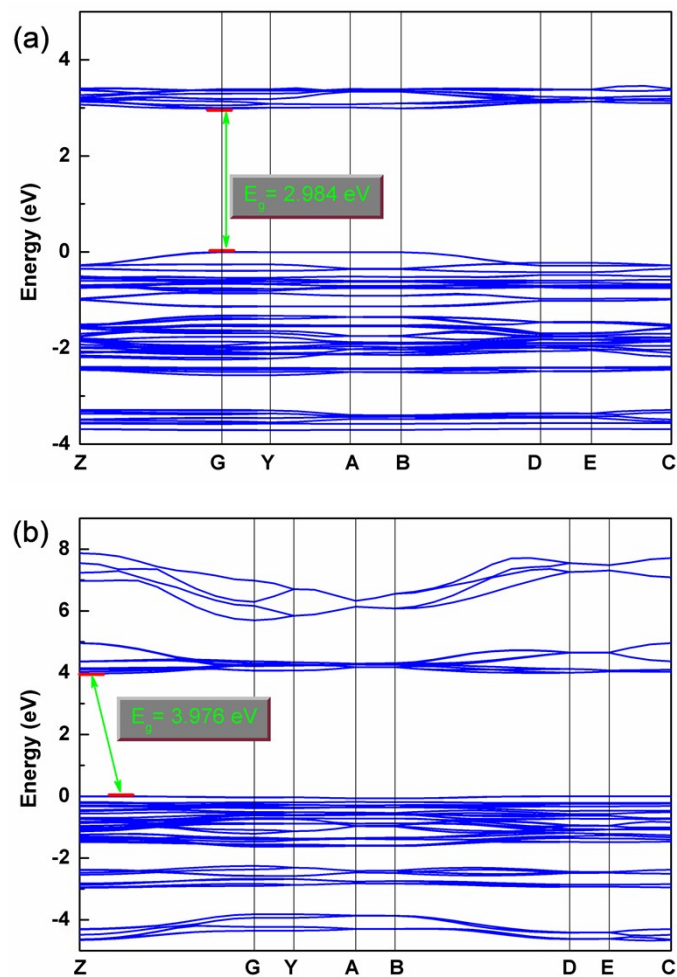

Fig. S3 Electronic band structures for (a) MELCI and (b) MELF.

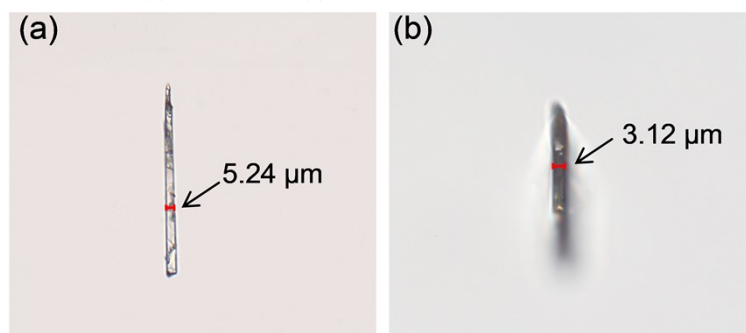

Fig. S4 The crystal thickness for the birefringence measurements (a) MELCI and (b) MELF.

**Table S1. The Fractional Atomic Coordinates ( $\times 10^4$ ) and Equivalent Isotropic Displacement Parameters ( $\text{\AA}^2 \times 10^3$ ) for  $\beta$ -( $\text{C}_3\text{H}_7\text{N}_6$ ) $_2\text{Cl}_2 \cdot \text{H}_2\text{O}$ .  $U_{\text{eq}}$  is defined as 1/3 of the trace of the orthogonalised  $U_{ij}$  tensor.**

| Atom | $x$        | $y$        | $z$        | $U(\text{eq})$ |
|------|------------|------------|------------|----------------|
| Cl1  | 7067.5(9)  | 5000       | 772(2)     | 56.6(4)        |
| Cl2  | 9431.1(9)  | 5000       | 7140.8(14) | 44.5(3)        |
| O1   | 6601(3)    | 5000       | 4871(6)    | 70.8(10)       |
| N1   | 5000       | 1566.0(14) | 5000       | 32.3(6)        |
| N2   | 3108.4(17) | 1556.4(10) | 4795(3)    | 37.5(5)        |
| N3   | 4013.0(15) | 2702.5(9)  | 4938(3)    | 24.7(4)        |
| N4   | 5000       | 3798.2(14) | 5000       | 41.3(8)        |
| C1   | 4028.7(18) | 1954.7(11) | 4909(3)    | 24.7(5)        |
| C2   | 5000       | 3052.5(16) | 5000       | 24.0(6)        |
| N5   | 10000      | 6522.8(13) | 0          | 30.8(6)        |
| N6   | 8123.8(17) | 6518.0(10) | -116(3)    | 37.4(5)        |
| N7   | 9011.2(15) | 7659.4(9)  | -68(3)     | 24.3(4)        |
| N8   | 10000      | 8755.3(14) | 0          | 38.7(7)        |
| C3   | 9035.7(18) | 6910.6(11) | -62(3)     | 24.1(5)        |
| C4   | 10000      | 8009.2(15) | 0          | 23.4(6)        |
| H1A  | 6628.99    | 5000       | 3567.86    | 85             |
| H1B  | 7372.59    | 5000       | 5987.16    | 85             |
| H1   | 5000       | 1079.38    | 5000       | 39             |
| H2A  | 2483.03    | 1782.66    | 4735.54    | 45             |
| H2B  | 3132.33    | 1070.26    | 4777.64    | 45             |
| H4A  | 5607.2     | 4041.56    | 5038       | 50             |
| H4B  | 4392.8     | 4041.56    | 4962       | 50             |
| H5   | 10000      | 6036.18    | 0          | 37             |
| H6A  | 7505.3     | 6748.06    | -157.77    | 45             |
| H6B  | 8146.5     | 6031.66    | -111.07    | 45             |
| H8A  | 9391.9     | 8998.61    | -42        | 46             |
| H8B  | 10608.1    | 8998.61    | 42         | 46             |

**Table S2. Anisotropic Displacement Parameters ( $\text{\AA}^2 \times 10^3$ ) for  $\beta\text{-(C}_3\text{H}_7\text{N}_6)_2\text{Cl}_2 \cdot \text{H}_2\text{O}$ . The anisotropic displacement factor exponent takes the form:  $-2\pi^2[\text{h}^2\text{a}^*2\text{U}_{11}+2\text{hka}^*\text{b}^*\text{U}_{12}+\dots]$ .**

| Atom | $U_{11}$ | $U_{22}$ | $U_{33}$  | $U_{23}$ | $U_{13}$ | $U_{12}$ |
|------|----------|----------|-----------|----------|----------|----------|
| Cl1  | 48.8(6)  | 20.2(4)  | 122.1(10) | 0        | 56.9(6)  | 0        |
| Cl2  | 56.4(6)  | 20.2(4)  | 47.2(6)   | 0        | 12.5(4)  | 0        |
| O1   | 49.0(18) | 41.2(15) | 134(3)    | 0        | 51(2)    | 0        |
| N1   | 24.6(13) | 17.2(12) | 57.9(18)  | 0        | 20.3(13) | 0        |
| N2   | 26.6(10) | 20.0(9)  | 72.1(15)  | 4.0(9)   | 27.0(10) | -1.3(7)  |
| N3   | 22.9(9)  | 20.5(9)  | 35.5(11)  | 1.0(7)   | 17.2(8)  | 0.1(7)   |
| N4   | 36.6(16) | 20.3(13) | 81(2)     | 0        | 38.9(16) | 0        |
| C1   | 22.2(11) | 22.6(10) | 30.4(11)  | 2.2(8)   | 12.4(9)  | 0.6(8)   |
| C2   | 24.0(15) | 21.7(13) | 29.5(16)  | 0        | 14.3(13) | 0        |
| N5   | 28.6(14) | 14.4(11) | 53.8(18)  | 0        | 21.8(13) | 0        |
| N6   | 30.5(10) | 21.7(9)  | 67.4(15)  | 0.9(9)   | 27.8(10) | -4.6(7)  |
| N7   | 22.4(9)  | 19.0(8)  | 36.1(11)  | 0.8(7)   | 17.0(8)  | -0.1(7)  |
| N8   | 31.3(15) | 17.7(12) | 79(2)     | 0        | 34.9(15) | 0        |
| C3   | 23.0(11) | 22.0(10) | 28.9(11)  | 0.3(8)   | 12.6(9)  | -1.4(8)  |
| C4   | 23.4(15) | 19.6(13) | 31.3(16)  | 0        | 15.5(13) | 0        |

**Table S3. Bond Lengths for  $\beta\text{-(C}_3\text{H}_7\text{N}_6)_2\text{Cl}_2 \cdot \text{H}_2\text{O}$ .**

| Atom Atom          | Length/ $\text{\AA}$ | Atom Atom          | Length/ $\text{\AA}$ |
|--------------------|----------------------|--------------------|----------------------|
| N1 C1 <sup>1</sup> | 1.368(2)             | N5 C3 <sup>2</sup> | 1.367(2)             |
| N1 C1              | 1.368(2)             | N5 C3              | 1.367(2)             |
| N2 C1              | 1.317(3)             | N6 C3              | 1.317(3)             |
| N3 C1              | 1.322(3)             | N7 C3              | 1.324(3)             |
| N3 C2              | 1.359(2)             | N7 C4              | 1.360(2)             |
| N4 C2              | 1.318(4)             | N8 C4              | 1.319(4)             |

<sup>1</sup>1-X,+Y,1-Z; <sup>2</sup>2-X,+Y,-Z

**Table S4. Bond Angles for  $\beta$ -(C<sub>3</sub>H<sub>7</sub>N<sub>6</sub>)<sub>2</sub>Cl<sub>2</sub>·H<sub>2</sub>O.**

| Atom | Atom | Atom            | Angle/°    | Atom            | Atom | Atom            | Angle/°    |
|------|------|-----------------|------------|-----------------|------|-----------------|------------|
| C1   | N1   | C1 <sup>1</sup> | 119.7(2)   | C3              | N5   | C3 <sup>2</sup> | 119.8(2)   |
| C1   | N3   | C2              | 115.87(18) | C3              | N7   | C4              | 115.80(18) |
| N2   | C1   | N1              | 117.55(19) | N6              | C3   | N5              | 118.10(19) |
| N2   | C1   | N3              | 121.13(19) | N6              | C3   | N7              | 120.55(19) |
| N3   | C1   | N1              | 121.32(19) | N7              | C3   | N5              | 121.35(18) |
| N3   | C2   | N3 <sup>1</sup> | 125.9(2)   | N7 <sup>2</sup> | C4   | N7              | 125.9(2)   |
| N4   | C2   | N3 <sup>1</sup> | 117.07(12) | N8              | C4   | N7              | 117.05(12) |
| N4   | C2   | N3              | 117.07(12) | N8              | C4   | N7 <sup>2</sup> | 117.05(12) |

<sup>1</sup>1-X,+Y,1-Z; <sup>2</sup>2-X,+Y,-Z

**Table S5. The Fractional Atomic Coordinates ( $\times 10^4$ ) and Equivalent Isotropic Displacement Parameters ( $\text{\AA}^2 \times 10^3$ ) for  $(\text{C}_3\text{H}_7\text{N}_6)\text{F}\cdot\text{H}_2\text{O}$ .  $U_{\text{eq}}$  is defined as 1/3 of the trace of the orthogonalised  $U_{ij}$  tensor.**

| Atom | x          | y          | z       | U(eq)   |
|------|------------|------------|---------|---------|
| sF1  | 6330(3)    | 5000       | 4930(7) | 55.2(8) |
| O1   | 3098(2)    | 10000      | 2131(7) | 33.6(7) |
| N1   | 5000       | 6480.9(18) | 5000    | 31.9(8) |
| N2   | 5999.4(18) | 7691.1(12) | 6870(6) | 30.7(6) |
| N3   | 5000       | 8859.0(19) | 5000    | 43.3(9) |
| N4   | 6905(2)    | 6473.9(14) | 8532(6) | 38.2(7) |
| C1   | 5984(2)    | 6892.1(15) | 6802(6) | 27.4(6) |
| C2   | 5000       | 8063(2)    | 5000    | 29.8(8) |
| H1A  | 2633.89    | 10128.6    | 3704.2  | 50      |
| H1B  | 2852.29    | 10071.5    | -68.7   | 50      |
| H1   | 4999.99    | 5962.34    | 4999.98 | 38      |
| H3A  | 4382.5     | 9118.3     | 3844.79 | 52      |
| H3B  | 5617.5     | 9118.3     | 6155.21 | 52      |
| H4B  | 7530.13    | 6717.77    | 9729.9  | 46      |
| H4A  | 6884.8     | 5955.61    | 8468.93 | 46      |

**Table S6. Anisotropic Displacement Parameters ( $\text{\AA}^2 \times 10^3$ ) for  $(\text{C}_3\text{H}_7\text{N}_6)\text{F}\cdot\text{H}_2\text{O}$ . The anisotropic displacement factor exponent takes the form:  $-2\pi^2[h^2a^{*2}U_{11}+2hka^*b^*U_{12}+\dots]$ .**

| Atom | $U_{11}$ | $U_{22}$ | $U_{33}$ | $U_{23}$ | $U_{13}$  | $U_{12}$ |
|------|----------|----------|----------|----------|-----------|----------|
| F1   | 57.1(16) | 29.4(13) | 77.2(18) | 0        | 1.7(14)   | 0        |
| O1   | 30.2(13) | 24.0(13) | 43.2(15) | 0        | -7.8(11)  | 0        |
| N1   | 31.6(16) | 20.6(15) | 41.2(17) | 0        | -4.5(13)  | 0        |
| N2   | 26.6(12) | 25.1(12) | 38.1(13) | 0.4(9)   | -5.3(10)  | 0.6(8)   |
| N3   | 34.0(17) | 23.5(17) | 67(2)    | 0        | -15.3(16) | 0        |
| N4   | 36.7(13) | 26.0(12) | 47.8(14) | 3.3(10)  | -10.2(11) | 2.4(10)  |
| C1   | 25.4(13) | 26.1(14) | 30.5(13) | 1.3(10)  | 2.5(11)   | 0.8(10)  |
| C2   | 26.1(17) | 24.8(18) | 37.0(19) | 0        | -2.0(15)  | 0        |

**Table S7. Bond Lengths for  $(\text{C}_3\text{H}_7\text{N}_6)\text{F}\cdot\text{H}_2\text{O}$ .**

| Atom Atom          | Length/ $\text{\AA}$ | Atom Atom | Length/ $\text{\AA}$ |
|--------------------|----------------------|-----------|----------------------|
| N1 C1 <sup>1</sup> | 1.363(3)             | N2 C2     | 1.354(3)             |
| N1 C1              | 1.363(3)             | N3 C2     | 1.320(5)             |
| N2 C1              | 1.325(3)             | N4 C1     | 1.311(3)             |
| N2 C1              | 1.325(3)             | N4 C1     | 1.311(3)             |

<sup>1</sup>1-X,+Y,1-Z

**Table S8. Bond Angles for (C<sub>3</sub>H<sub>7</sub>N<sub>6</sub>)F·H<sub>2</sub>O.**

| Atom            | Atom | Atom | Angle/°  | Atom            | Atom | Atom            | Angle/°    |
|-----------------|------|------|----------|-----------------|------|-----------------|------------|
| C1 <sup>1</sup> | N1   | C1   | 119.9(3) | N4              | C1   | N2              | 120.8(2)   |
| C1              | N2   | C2   | 116.0(2) | N2 <sup>1</sup> | C2   | N2              | 125.8(3)   |
| N2              | C1   | N1   | 121.1(2) | N3              | C2   | N2 <sup>1</sup> | 117.09(16) |
| N4              | C1   | N1   | 118.0(2) | N3              | C2   | N2              | 117.09(16) |

<sup>1</sup>1-X,+Y,1-Z**Table S9. Hydrogen Bonds for (C<sub>3</sub>H<sub>7</sub>N<sub>6</sub>)F·H<sub>2</sub>O.**

| D  | H   | A               | d(D-H)/Å | d(H-A)/Å | d(D-A)/Å | D-H-A/° |
|----|-----|-----------------|----------|----------|----------|---------|
| O1 | H1A | F1 <sup>1</sup> | 0.85     | 1.54     | 2.281(4) | 144.0   |
| N1 | H1  | F1              | 0.86     | 2.14     | 2.840(3) | 138.2   |
| N1 | H1  | F1 <sup>2</sup> | 0.86     | 2.14     | 2.840(3) | 138.2   |
| N3 | H3A | O1              | 0.86     | 2.05     | 2.888(3) | 163.0   |
| N3 | H3B | O1 <sup>2</sup> | 0.86     | 2.05     | 2.888(3) | 163.0   |
| N4 | H4A | F1              | 0.86     | 2.11     | 2.829(3) | 140.5   |

<sup>1</sup>-1/2+X,1/2+Y,+Z; <sup>2</sup>1-X,+Y,1-Z
